# Supplementary material for: Transcriptome and excretory–secretory proteome of infective-stage larvae of the nematode Gnathostoma spinigerum reveal potential immunodiagnostic targets for development
Source: PubMed Central journal article supplement (PMC6550564; doi:10.1051/parasite/2019033), 2019-06-05
Supplement: parasite-26-34-s5.pdf [file parasite-26-34-s5.pdf]

# **Supplementary Figure S1**

The quality and quantity of the total RNA sample

Assay Class: Eukaryote Total RNA Nano  
Data Path: C:\...Eukaryote Total RNA Nano\_DE24802309\_2017-06-15\_11-26-19.xad

Created: 6/15/2017 11:26:19 AM  
Modified: 6/15/2017 2:26:48 PM

### Electropherogram Summary

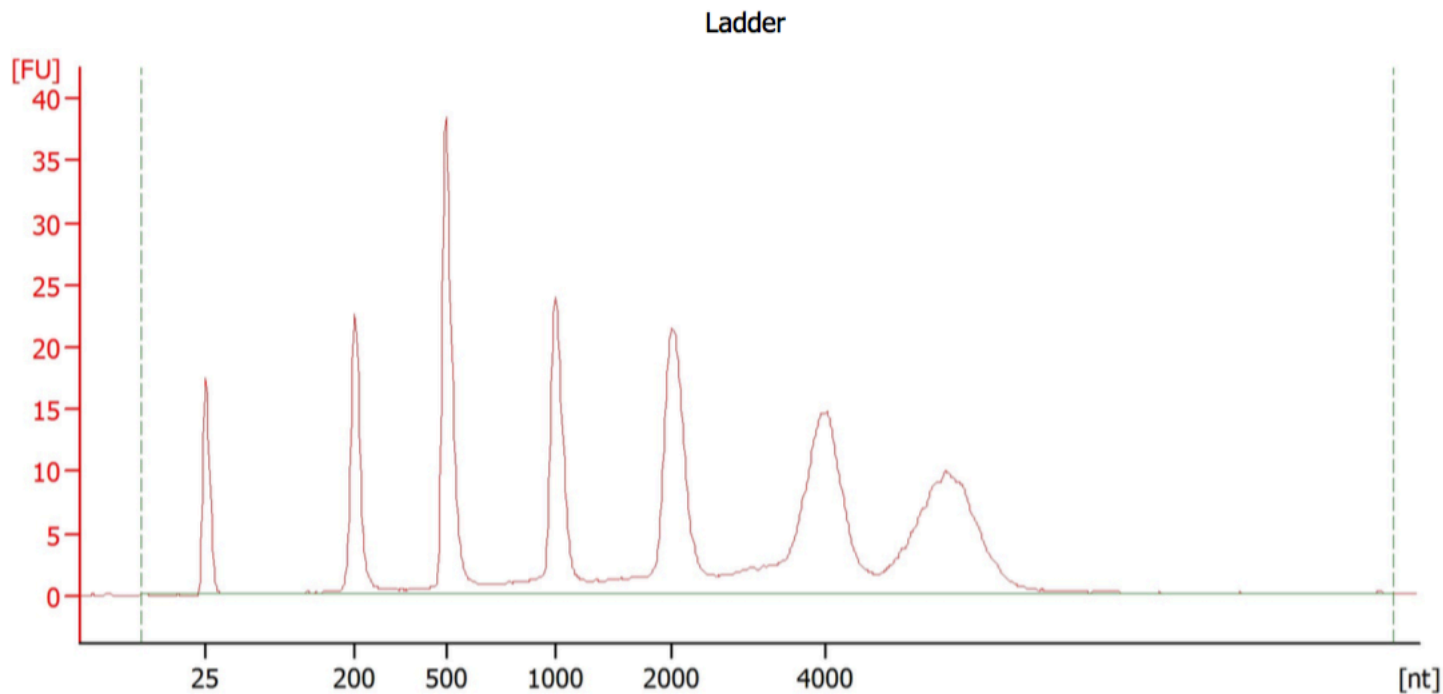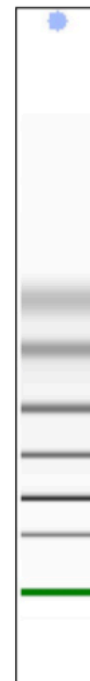

### Overall Results for Ladder

|                    |                 |                        |                                                                                                                             |
|--------------------|-----------------|------------------------|-----------------------------------------------------------------------------------------------------------------------------|
| RNA Area:          | 330.7           | Result Flagging Color: | <span style="background-color: #6699ff; border: 1px solid black; display: inline-block; width: 20px; height: 10px;"></span> |
| RNA Concentration: | 150 ng/ $\mu$ l | Result Flagging Label: | All Other Samples                                                                                                           |

Assay Class: Eukaryote Total RNA Nano  
Data Path: C:\...Eukaryote Total RNA Nano\_DE24802309\_2017-06-15\_11-26-19.xad

Created: 6/15/2017 11:26:19 AM  
Modified: 6/15/2017 2:26:48 PM

### Electropherogram Summary Continued ...

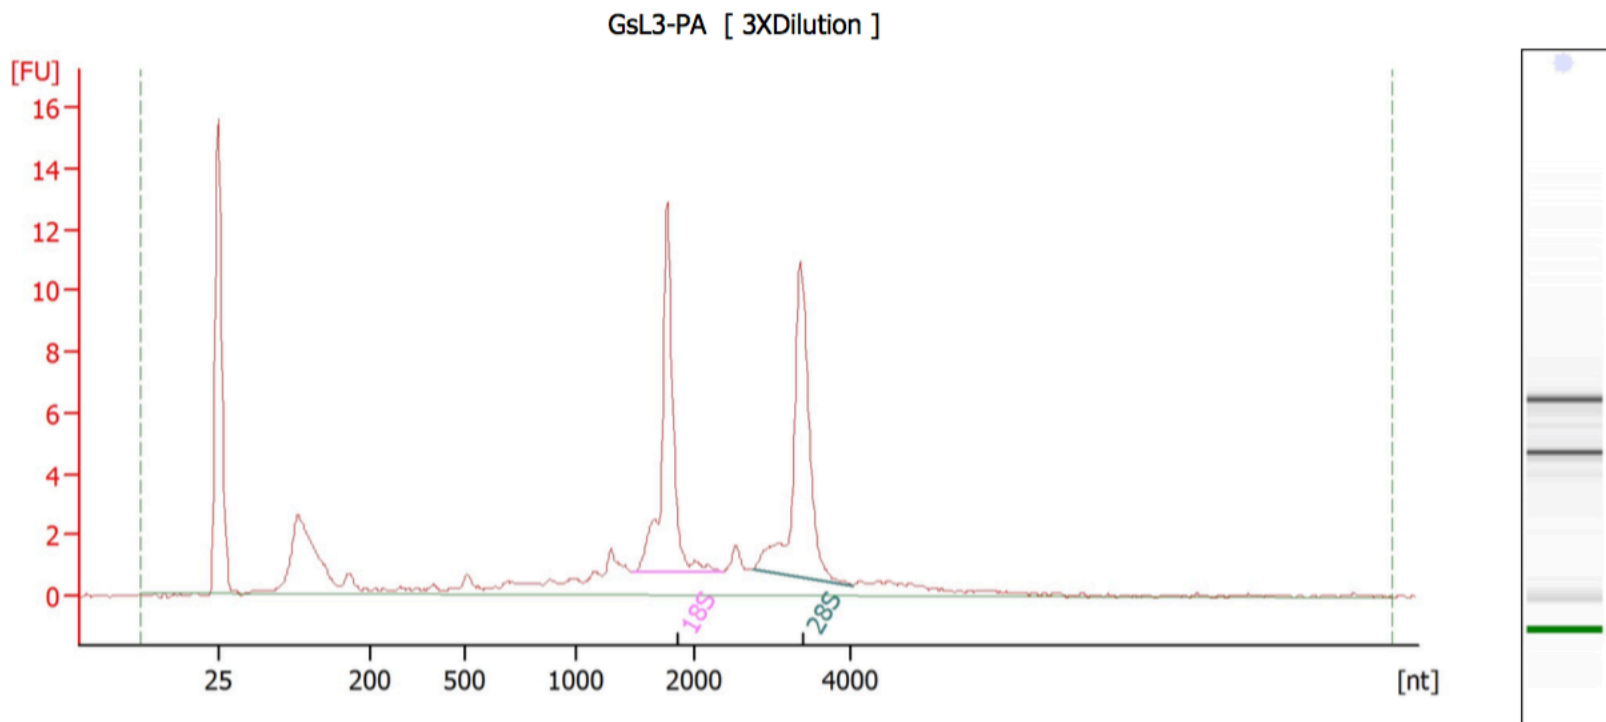

#### Overall Results for sample 7 : GsL3-PA

|                         |                |                             |                                                                                                                             |
|-------------------------|----------------|-----------------------------|-----------------------------------------------------------------------------------------------------------------------------|
| RNA Area:               | 76.5           | RNA Integrity Number (RIN): | 8.9 (B.02.08)                                                                                                               |
| RNA Concentration:      | 35 ng/ $\mu$ l | Result Flagging Color:      | <span style="background-color: #ccccff; border: 1px solid black; display: inline-block; width: 20px; height: 10px;"></span> |
| rRNA Ratio [28s / 18s]: | 1.1            | Result Flagging Label:      | RIN: 8.90                                                                                                                   |

#### Fragment table for sample 7 : GsL3-PA

| Name | Start Size [nt] | End Size [nt] | Area | % of total Area |
|------|-----------------|---------------|------|-----------------|
| 18S  | 1,485           | 2,349         | 15.7 | 20.5            |
| 28S  | 2,737           | 4,014         | 16.7 | 21.8            |
