# Supplementary material for: Transcriptome and excretory–secretory proteome of infective-stage larvae of the nematode Gnathostoma spinigerum reveal potential immunodiagnostic targets for development
Source: PubMed Central journal article supplement (PMC6550564; doi:10.1051/parasite/2019033), 2019-06-05

## **Supplementary Figure S3**

Base quality distribution of the read lengths

## Gs-R1: Base Quality Distribution

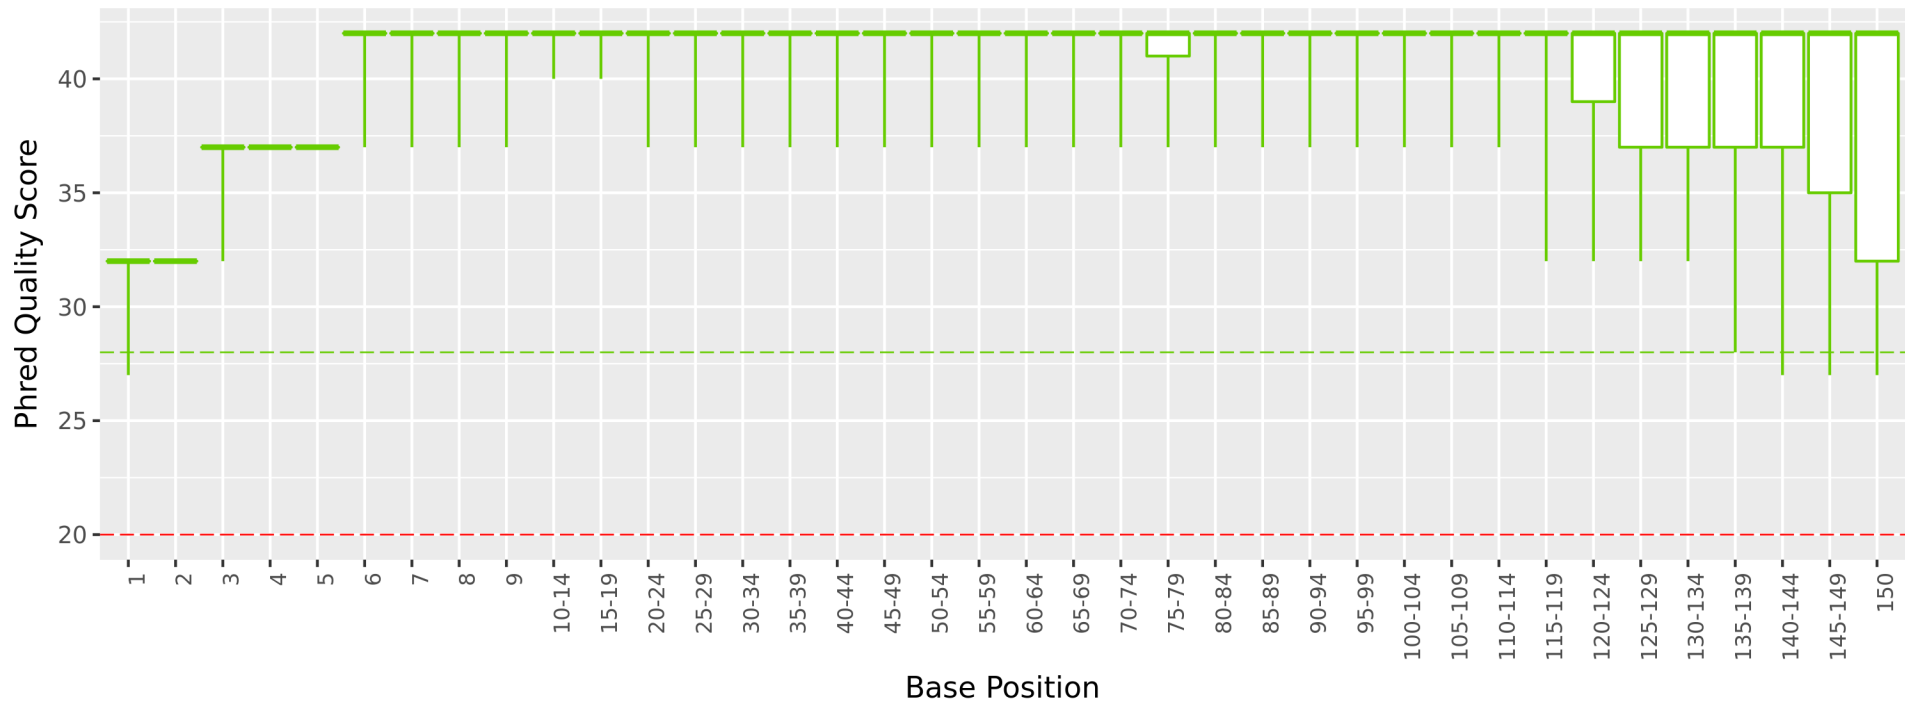

Gs-R1-paired: Base Quality Distribution

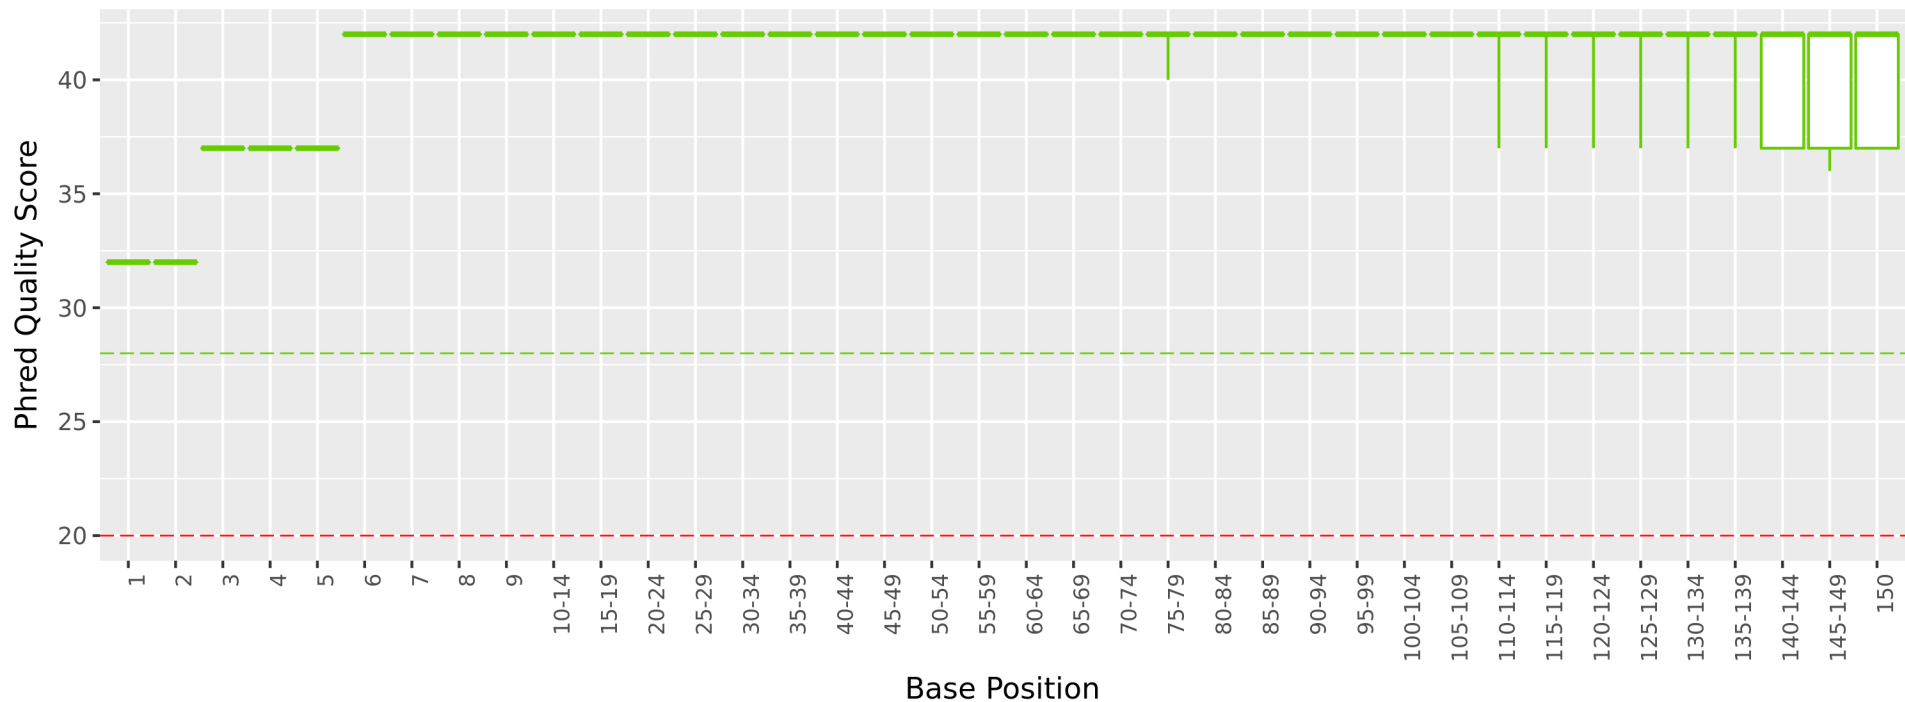

Gs-R2: Base Quality Distribution

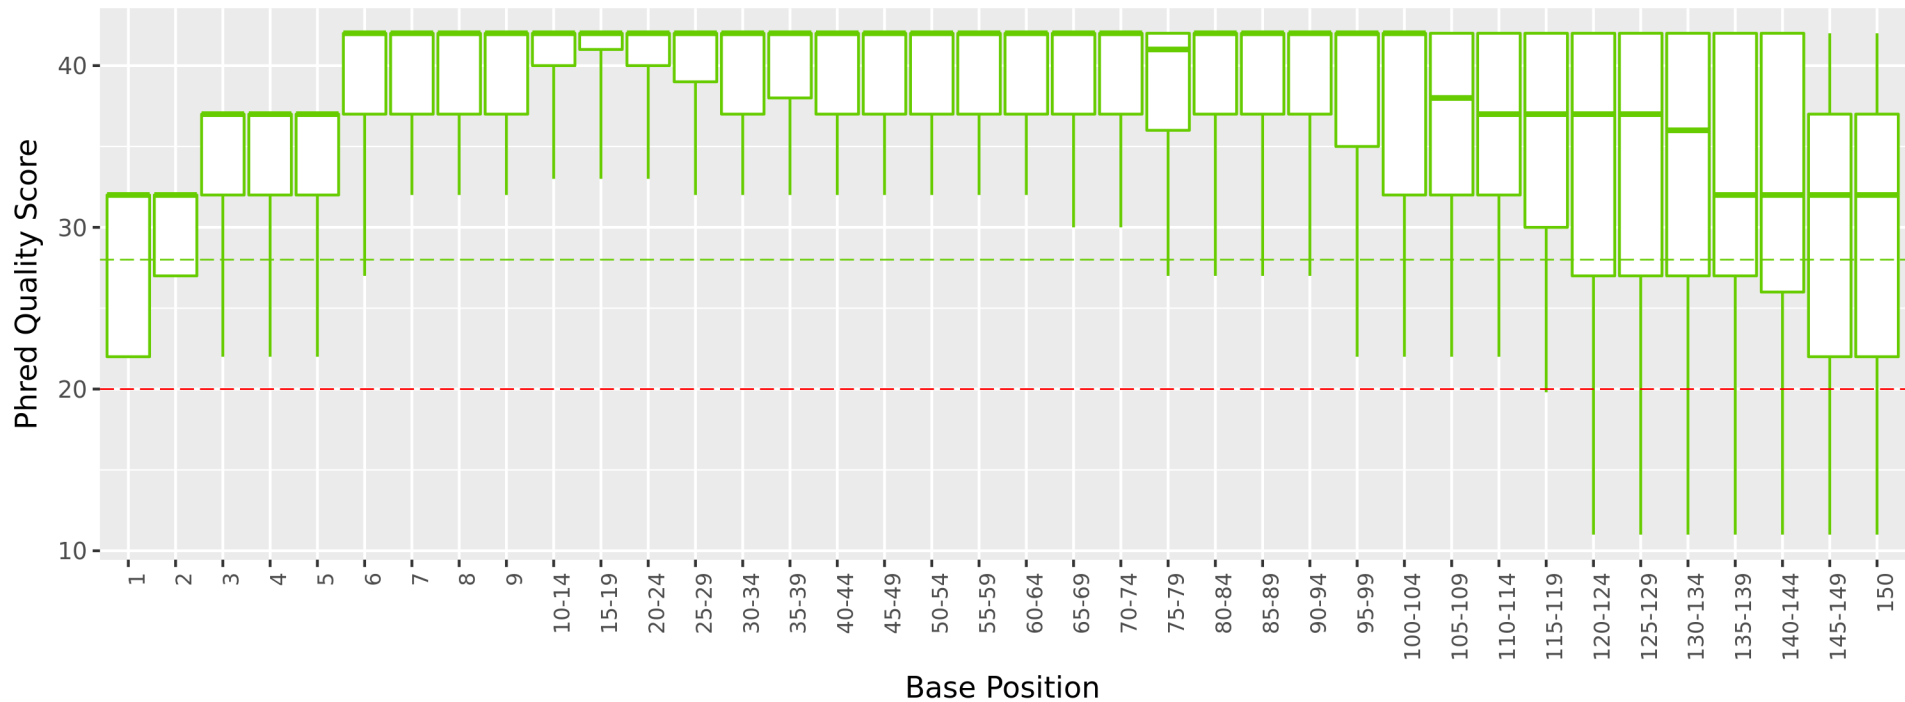

Gs-R2-paired: Base Quality Distribution

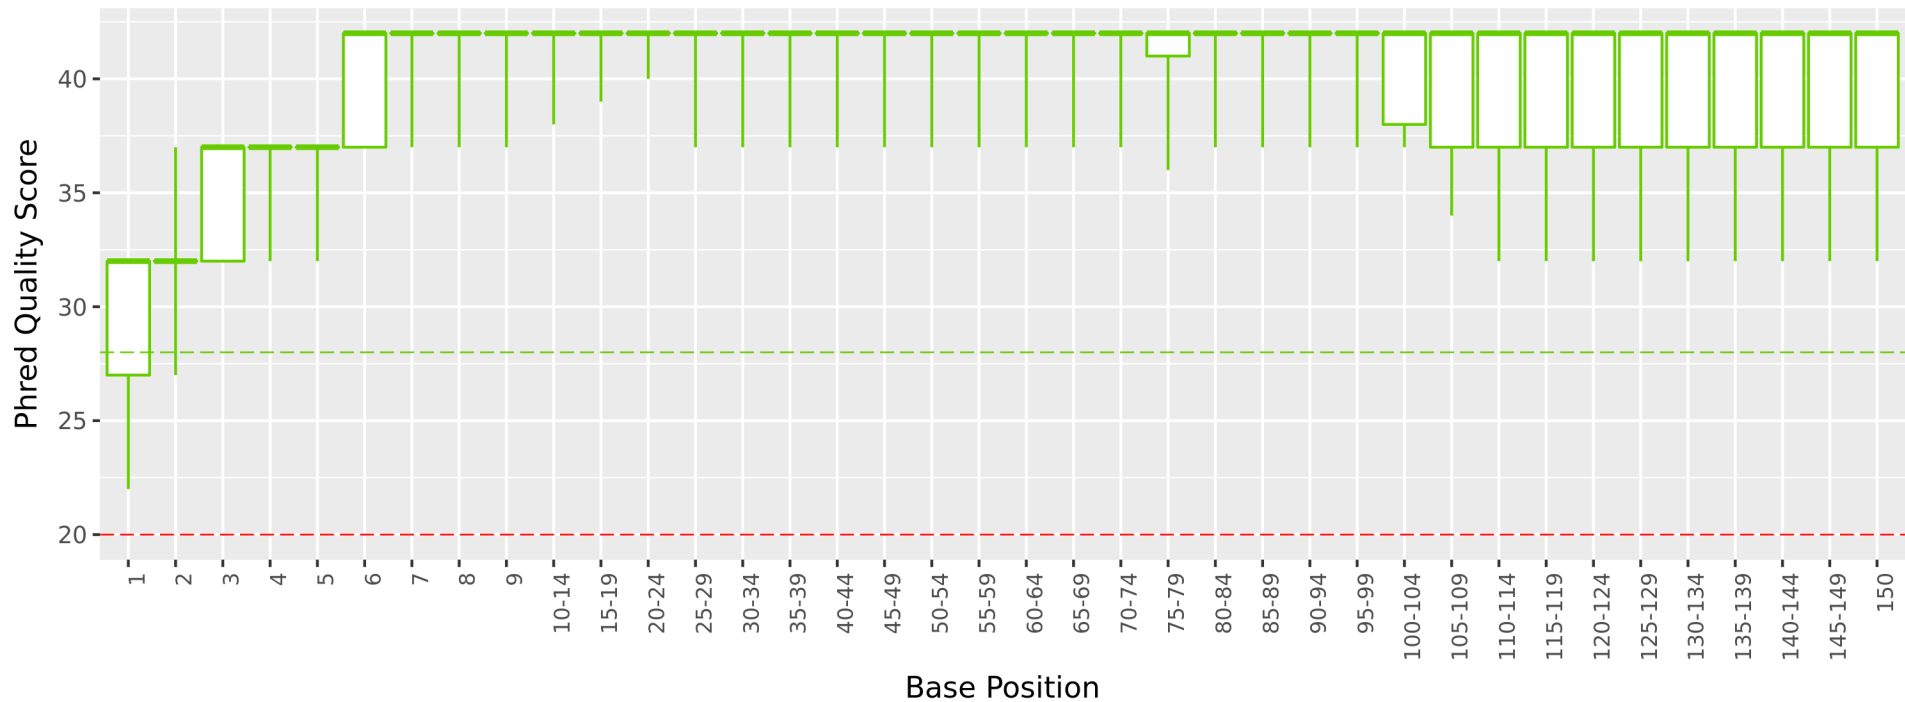

Supplement: parasite-26-34-s7.pdf [file parasite-26-34-s7.pdf]
