# Supplementary material for: Transcriptome and excretory–secretory proteome of infective-stage larvae of the nematode Gnathostoma spinigerum reveal potential immunodiagnostic targets for development
Source: PubMed Central journal article supplement (PMC6550564; doi:10.1051/parasite/2019033), 2019-06-05

## **Supplementary Figure S4**

Density (smoothed frequency) of the contigs according to the length of the advanced third-stage larvae of *Gnathostoma spinigerum* (aL3Gs) data set

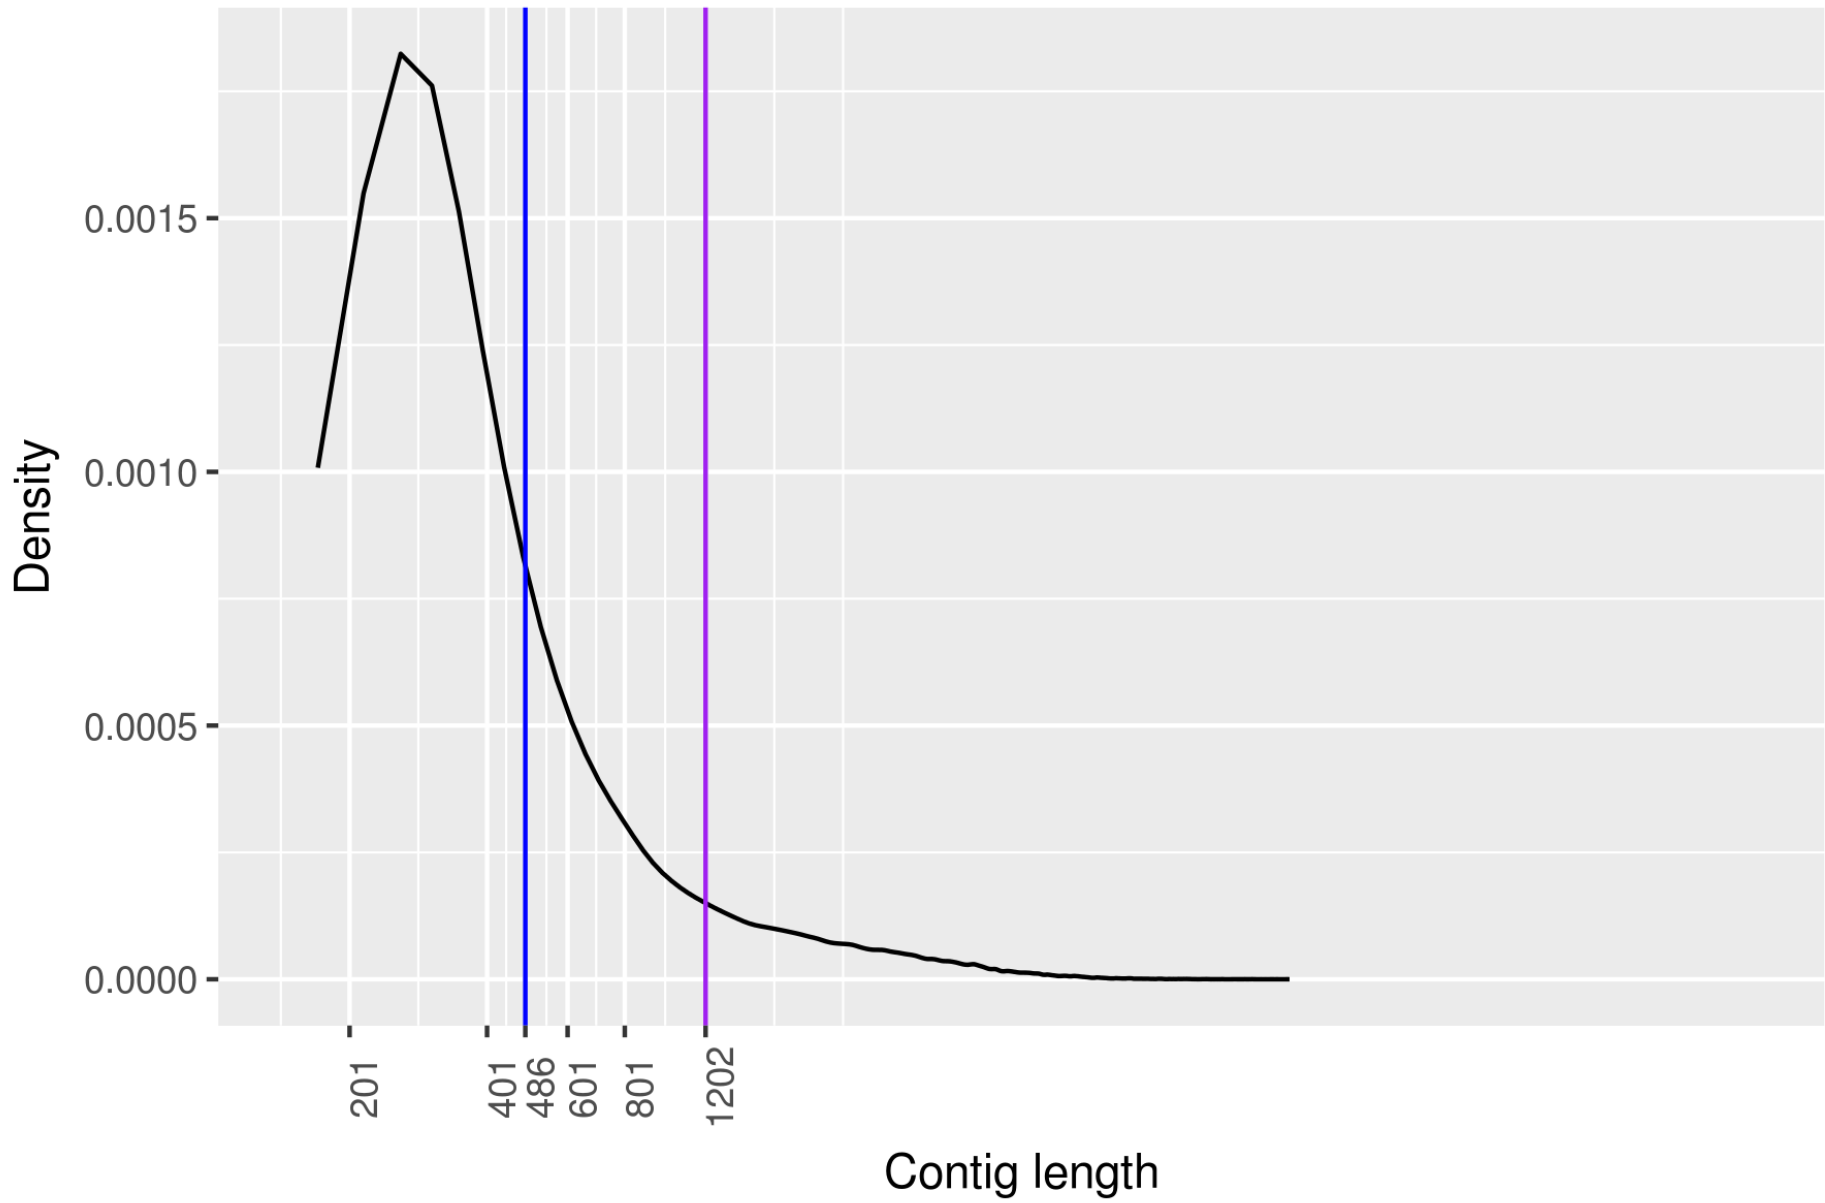

Supplement: parasite-26-34-s8.pdf [file parasite-26-34-s8.pdf]
