# Supplementary material for: Transcriptome and excretory–secretory proteome of infective-stage larvae of the nematode Gnathostoma spinigerum reveal potential immunodiagnostic targets for development
Source: PubMed Central journal article supplement (PMC6550564; doi:10.1051/parasite/2019033), 2019-06-05
Supplement: parasite-26-34-s9.pdf [file parasite-26-34-s9.pdf]

# **Supplementary Figure S5**

Species distribution of BLAST hits against the  
UniProt database

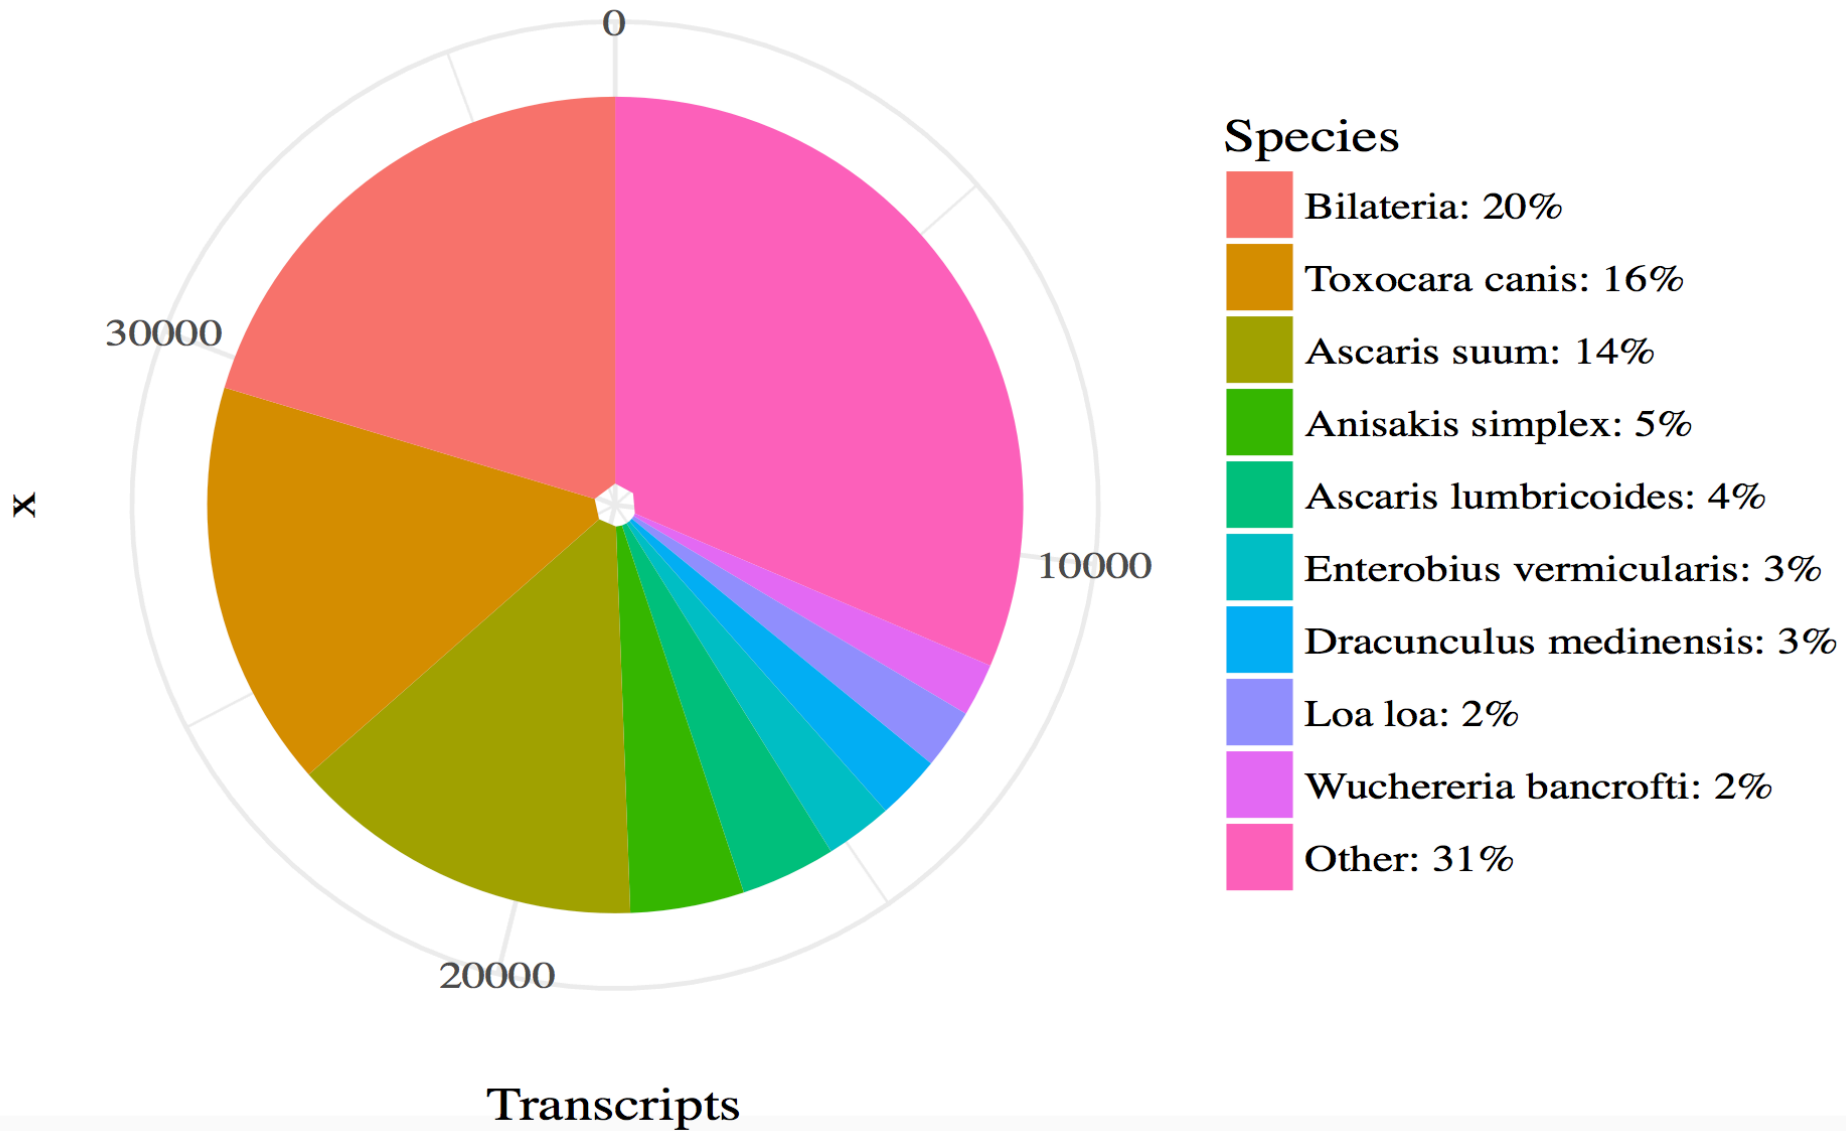

The pie chart depicts the species distribution of the best alignment, with a cutoff threshold of  $1E^{-5}$ .
