# Supplementary material for: Transcriptome and excretory–secretory proteome of infective-stage larvae of the nematode Gnathostoma spinigerum reveal potential immunodiagnostic targets for development
Source: PubMed Central journal article supplement (PMC6550564; doi:10.1051/parasite/2019033), 2019-06-05

# **Supplementary Figure S6**

*E*-value of the identity distribution

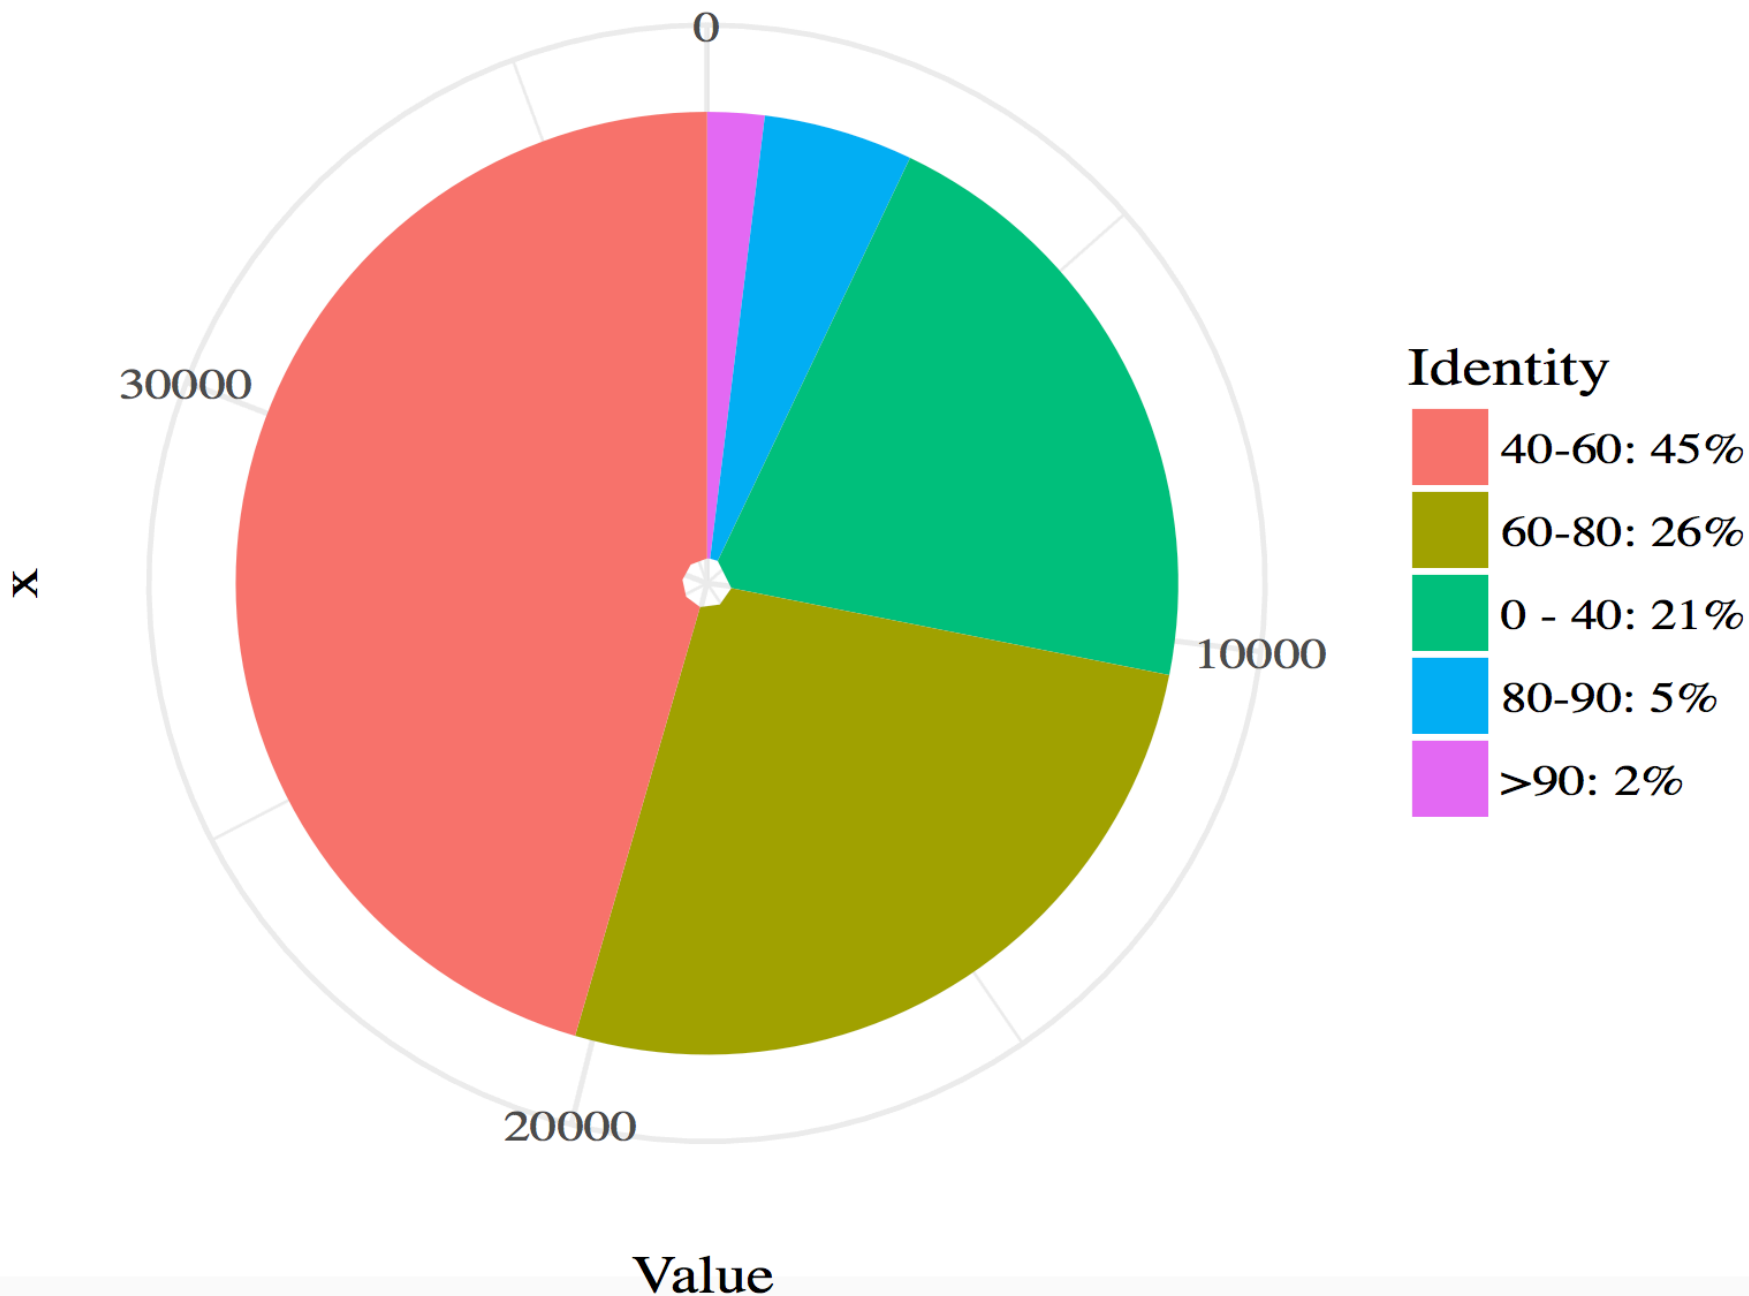

Supplement: parasite-26-34-s10.pdf [file parasite-26-34-s10.pdf]
