# Supplementary material for: Transcriptome and excretory–secretory proteome of infective-stage larvae of the nematode Gnathostoma spinigerum reveal potential immunodiagnostic targets for development
Source: PubMed Central journal article supplement (PMC6550564; doi:10.1051/parasite/2019033), 2019-06-05
Supplement: parasite-26-34-s11.pdf [file parasite-26-34-s11.pdf]

# Supplementary Figure S7

The top 20 enriched GO terms among advanced third-stage larvae of *Gnathostoma spinigerum* (aL3Gs) transcripts.

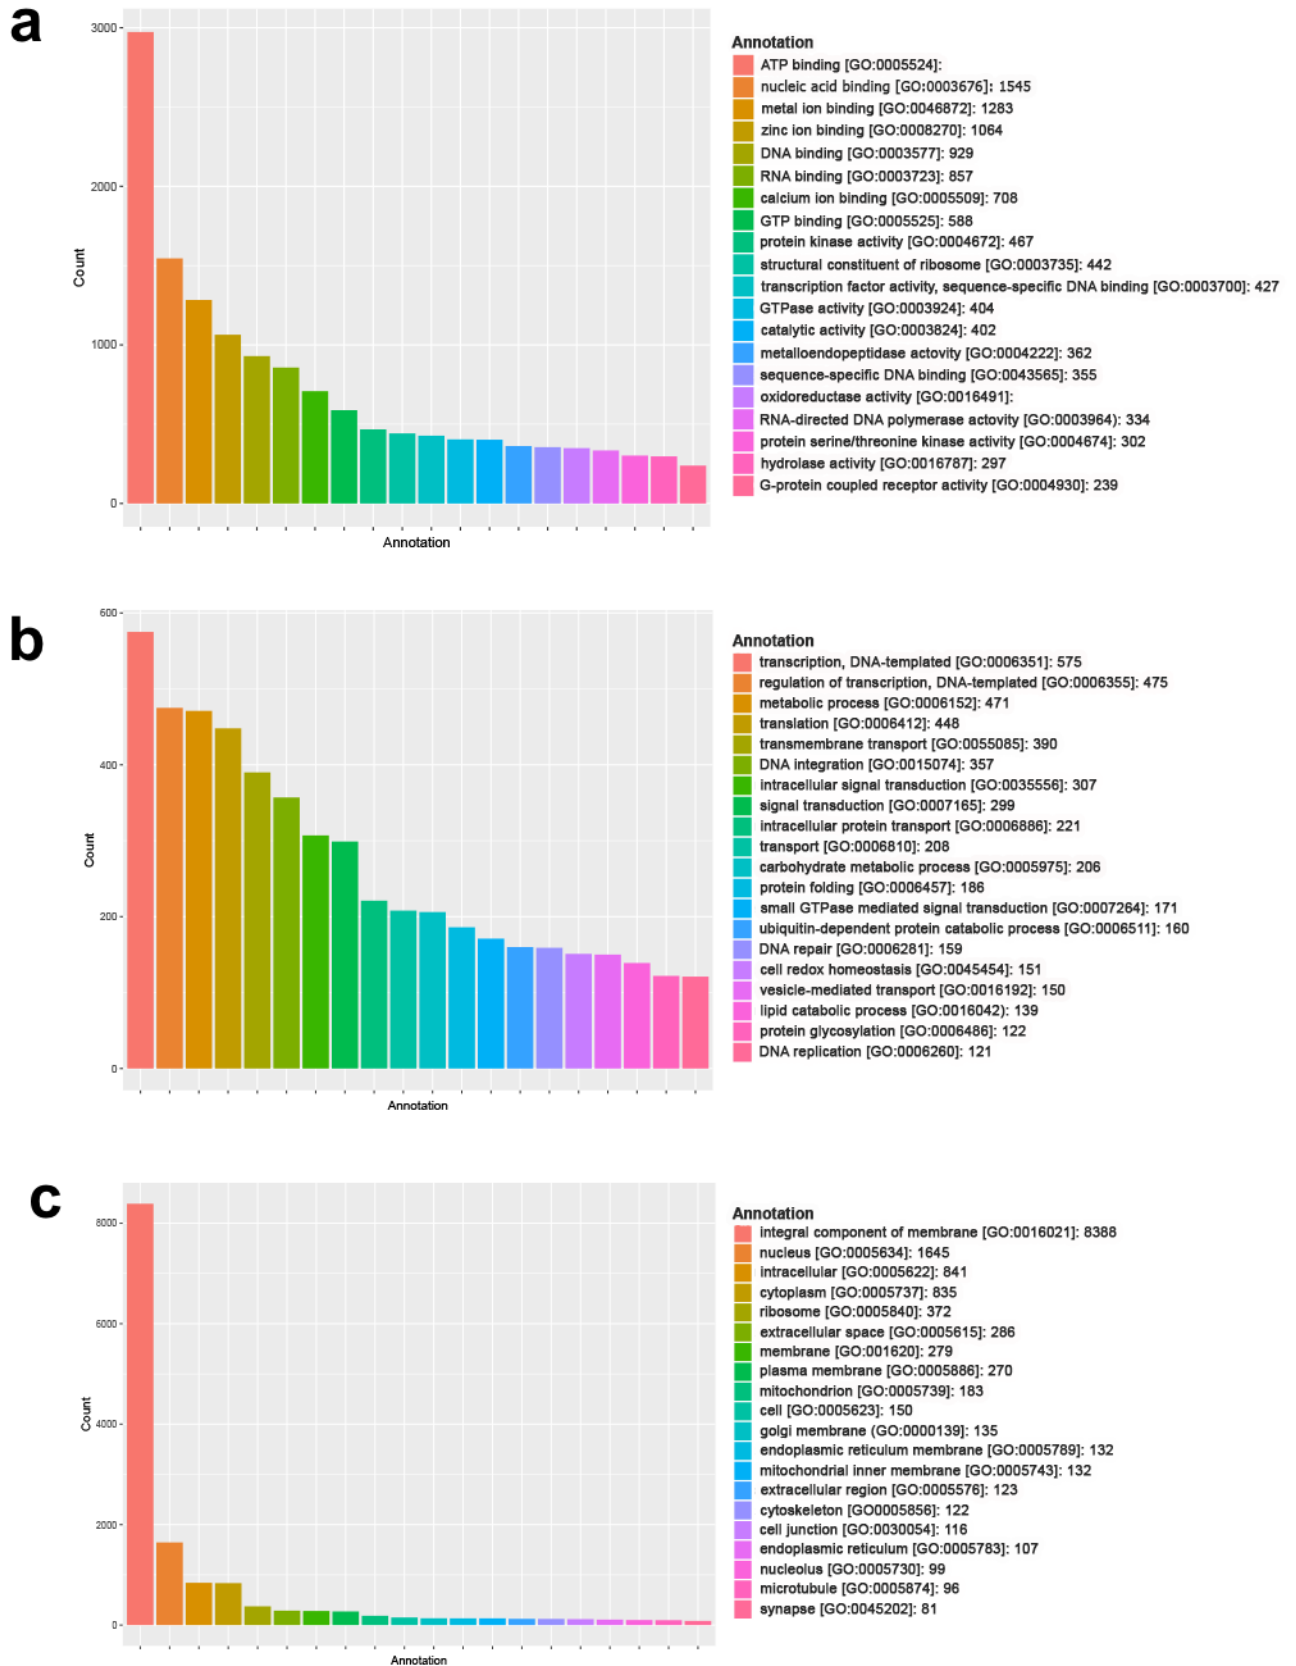

The transcript counts for the GO categories of molecular functions (a), cellular components (b), and biological processes (c). GO functions are shown on the right Y-axis. The number of transcripts with each GO function is shown on the left Y-axis.
